# Supplementary material
Source: PubMed Central journal article supplement (PMC7685892)
Supplement: JCM.01780-20-s0001.pdf [file JCM.01780-20-s0001.pdf]

## Supplemental Material

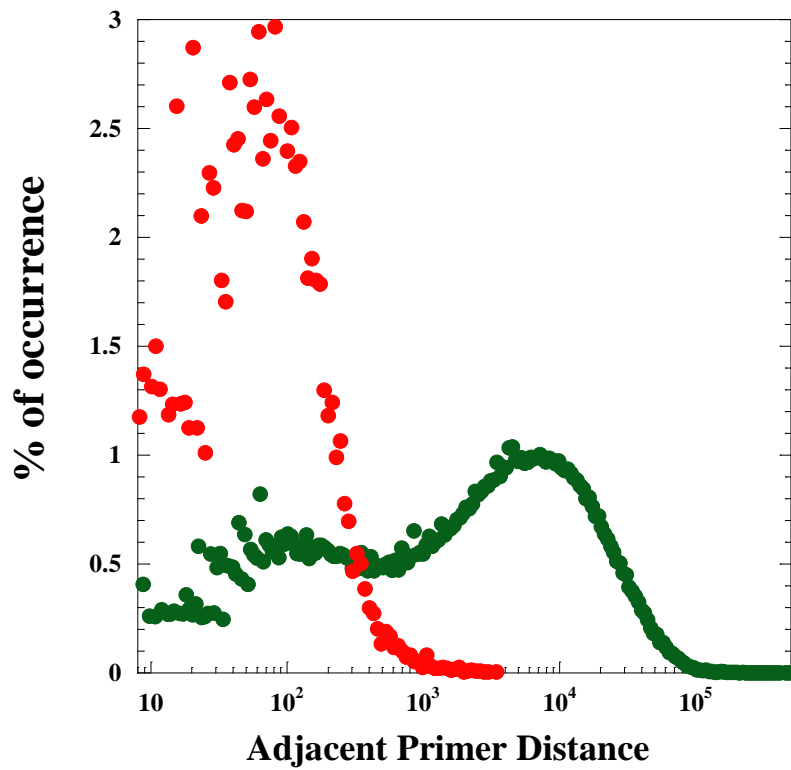

Figure S1. Distribution of distances between adjacent heptamers bound to Nm (red) or human (green) DNA. Shorter inter-primer distances indicate higher density of binding to the DNA.

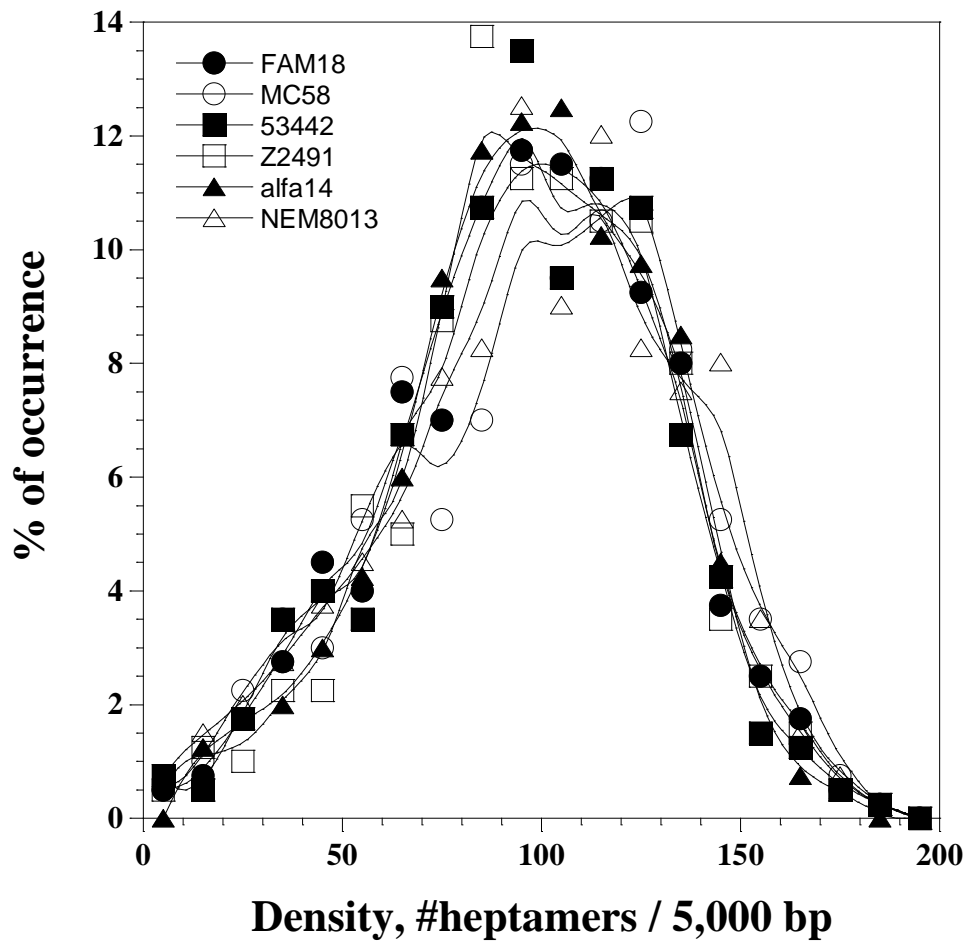

Figure S2. Density distribution of 25 selected heptamers on multiple complete Nm genomes.

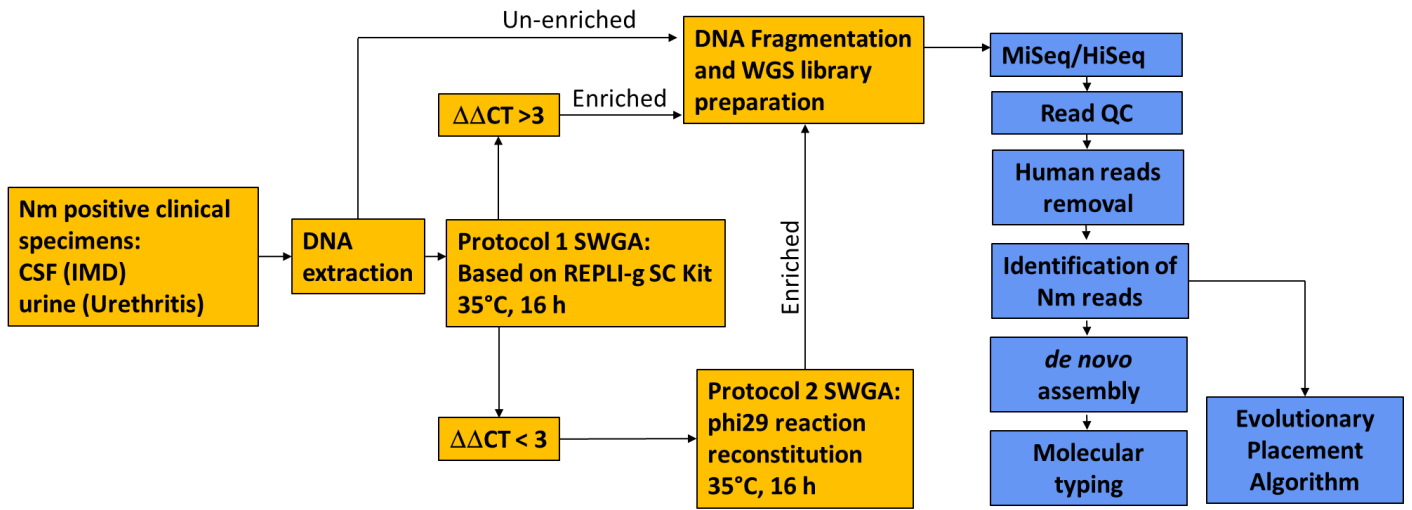

Figure S3. Scheme of the workflow used in the study. Orange boxes - bench work; Blue boxes – data analysis

Table S1: Primers used for selective whole genome amplification.

| Heptamer sequence | No. of Nm DNA binding sites | No. of Human DNA binding sites | Nm DNA binding bias score |
|-------------------|-----------------------------|--------------------------------|---------------------------|
| TTCGGCG           | 1,500                       | 7,863                          | 256                       |
| CGCCGAT           | 1,127                       | 6,306                          | 240                       |
| GTCGGCG           | 1,326                       | 12,429                         | 143                       |
| CGGCGAA           | 1,219                       | 11,702                         | 140                       |
| TCGGCGG           | 1,615                       | 17,251                         | 125                       |
| AACGGCG           | 1,200                       | 13,852                         | 116                       |
| CGGCGGT           | 1,460                       | 17,293                         | 113                       |
| CGACGGC           | 1,141                       | 13,689                         | 112                       |
| AACGCCG           | 1,182                       | 14,483                         | 109                       |
| ACGGCGG           | 1,597                       | 20,873                         | 103                       |
| GACGGCG           | 1,553                       | 21,078                         | 99                        |
| CGGCGCG           | 1,931                       | 29,762                         | 87                        |
| CGTCGCC           | 1,073                       | 17,350                         | 83                        |
| CGTGCCG           | 1,106                       | 17,898                         | 83                        |
| GCGGCGA           | 1,182                       | 19,363                         | 82                        |
| TCCGCCG           | 1,248                       | 20,634                         | 81                        |
| GACGGCA           | 2,973                       | 50,481                         | 79                        |
| TGCGCCG           | 1,226                       | 21,125                         | 78                        |
| GCGGCAA           | 2,077                       | 36,333                         | 77                        |
| TGCCGCG           | 1,033                       | 18,548                         | 75                        |
| TGCGCGG           | 1,087                       | 19,724                         | 74                        |
| ACGGCAT           | 2,542                       | 49,591                         | 69                        |
| GCCGCCG           | 3,283                       | 69,500                         | 63                        |
| TGCGGCG           | 1,130                       | 24,057                         | 63                        |
| TTGCCGA           | 1,907                       | 41,873                         | 61                        |
| <b>Total</b>      | <b>38,718</b>               | <b>593,058</b>                 |                           |

Table S2. Primers and probes used for 7 gene markers used in the study

| Marker                                      | Position in Nm Genome <sup>a</sup> | Primer Name | Sequence <sup>b</sup>           | Final nM |
|---------------------------------------------|------------------------------------|-------------|---------------------------------|----------|
| <i>sdhA</i>                                 | 925,196                            | Forward     | AAGTAATTTGGGGGTAAGTATGGG        | 300      |
|                                             |                                    | Reverse     | CGGATTTGGATAATTGGAGGGC          | 300      |
|                                             |                                    | Probe       | TTGTCGGCGGTGGTGGTGCAGGTTT       | 100      |
| NEIS2381 <sup>c</sup>                       | 743,614                            | Forward     | CCGCTTCCAAATTCTGCAT             | 300      |
|                                             |                                    | Reverse     | TTCCACTCCTCGACAATCCT            | 300      |
|                                             |                                    | Probe       | CCGCCGCCGCTT"TCGTCTTTTTTACTT    | 100      |
| NEIS0417                                    | 436,233                            | Forward     | GGCGGAATAAACACACAATGAG          | 300      |
|                                             |                                    | Reverse     | GAGCAAAGCGACCGCAAA              | 300      |
|                                             |                                    | Probe       | AGCTGAAAAAAGCGAACCCACGGACGGGAAA | 100      |
| NEIS2065                                    | 2,119,668                          | Forward     | CGCGGGGTTTCCATGTCAA             | 300      |
|                                             |                                    | Reverse     | CGCTGGCTGGTGCTGAATAA            | 300      |
|                                             |                                    | Probe       | AGTGCGCGTT"TTGGGCTTCTTCTCGT     | 100      |
| NEIS1699                                    | 1,733,621                          | Forward     | CCCATACTGTTCTCCCCGT             | 300      |
|                                             |                                    | Reverse     | ATTTTACCGTTGCCCCCAT             | 300      |
|                                             |                                    | Probe       | CGCGCTTTTGCG"TTTCGCTGTCCGTT     | 100      |
| <i>sodC</i>                                 | 1,325,109                          | Forward     | GCACACTTAGGTGATTTACCTGCAT       | 300      |
|                                             |                                    | Reverse     | CCACCCGTGTGGATCATAATAGA         | 600      |
|                                             |                                    | Probe       | CATGATGGCACAGCAACAAATCCTGTTT    | 100      |
| RNase P gene <sup>d</sup><br>( <i>rnp</i> ) |                                    | Forward     | CCAAGTGTGAGGGCTGAAAAG           | 400      |
|                                             |                                    | Reverse     | TGTTGTGGCTGATGAACTATAAAAAGG     | 400      |
|                                             |                                    | Probe       | CCCCAGTCTCTGTCAGCACTCCCTTC      | 100      |

<sup>a</sup> Position of 5' end of forward primer binding site on the FAM18 Nm reference genome

<sup>b</sup> All probes contain FAM on 5' and BHQ1 on 3' except those containing BHQ1 on internal thymines designated as "T". In the latter cases probes contain SpC6 on 3'.

<sup>c</sup> 'NEIS' markers are defined according to PubMLST Neisseria database.

<sup>d</sup> *Homo sapiens* ribonuclease P/MRP subunit p30 (RPP30), transcript variant 2, mRNA; NCBI Reference Sequence: NM\_006413.4

Table S3. Expanded data on analysis of unenriched and SWGA-enriched specimens by rt-PCR and sequencing

| Specimen ID | Protocol | rt-PCR                        |                             |                             |                            |                   | No. Nm reads (%) <sup>a</sup> |                 | Fold Enrichment <sup>b</sup> | % of genome with $\geq 10$ -fold coverage depth |          |
|-------------|----------|-------------------------------|-----------------------------|-----------------------------|----------------------------|-------------------|-------------------------------|-----------------|------------------------------|-------------------------------------------------|----------|
|             |          | Ct <sub>sodC</sub> unenriched | Ct <sub>sodC</sub> enriched | $\Delta$ Ct <sub>sodC</sub> | $\Delta$ Ct <sub>rnp</sub> | $\Delta\Delta$ Ct | Unenriched                    | Enriched        |                              | Unenriched                                      | Enriched |
| Ur-1        | 1        | 27.4                          | 15.9                        | 11.5                        | -1.1                       | 12.6              | 22,840(0.4)                   | 1,964,728(66.1) | 165                          | 1.8                                             | 35.5     |
| Ur-2        | 2        | 28.8                          | 10.9                        | 17.9                        | 0.9                        | 17.0              | 4,706(0.1)                    | 4,077,546(90.5) | 905                          | 0.03                                            | 97.6     |
| Ur-3        | 1        | 28.6                          | 13.2                        | 15.5                        | -0.8                       | 16.3              | 2,648(0.05)                   | 1,589,045(67.3) | 1346                         | 0.01                                            | 51.8     |
| Ur-4        | 2        | 28.1                          | 16.9                        | 11.1                        | -5.2                       | 16.3              | 1,584(0.03)                   | 2,352,295(57.2) | 1907                         | <0.01                                           | 48.9     |
| Ur-5        | 1        | 25.5                          | 9.9                         | 15.6                        | 0                          | 15.6              | 14,685(0.4)                   | 1,314,987(77.7) | 194                          | 0.6                                             | 97.6     |
| Ur-6        | 2        | 29.0                          | 18.8                        | 10.2                        | 1.8                        | 8.4               | 34,454(0.7)                   | 48,235(1.1)     | 2                            | 7.4                                             | 14.1     |
| Ur-7        | 1        | 24.5                          | 10.0                        | 14.5                        | -1.4                       | 15.9              | 15,547(0.4)                   | 824,190(61.9)   | 155                          | 0.6                                             | 93.3     |
| Ur-8        | 1        | 28.3                          | 12.3                        | 16.1                        | -1.8                       | 17.9              | 54,350(1.6)                   | 1,137,691(65.9) | 41                           | 36.9                                            | 40.0     |
| Ur-9        | 1        | 18.8                          | 15.5                        | 3.3                         | -3.3                       | 6.6               | 710(0.02)                     | 243,875(3.7)    | 185                          | <0.01                                           | 89.6     |
| Ur-10       | 1        | 20.2                          | 14.8                        | 5.4                         | -3.4                       | 8.8               | 1,150(0.04)                   | 148,803(6.2)    | 155                          | <0.01                                           | 76.3     |
| Ur-11       | 2        | 30.0                          | 12.8                        | 17.2                        | 10.4                       | 6.8               | 2,452(0.09)                   | 679,812(21.1)   | 234                          | <0.01                                           | 90.0     |
| Ur-12       | 1        | 30.8                          | 23.3                        | 7.6                         | -0.2                       | 7.8               | 2,156(0.04)                   | 81,622(2.2)     | 55                           | 0.01                                            | 3.0      |
| CSF-1       | 1        | 22.4                          | 11.9                        | 10.5                        | 3.2                        | 7.3               | 29,320(1)                     | 734,365(33.3)   | 33                           | 7.4                                             | 93.5     |
| CSF-2       | 1        | 18.6                          | 16.7                        | 1.9                         | 1.5                        | 0.4               | 11,466(0.2)                   | 23,543(0.7)     | 4                            | 0.4                                             | 9.1      |
| CSF-3       | 1        | 19.5                          | 17.8                        | 1.7                         | 1.2                        | 0.5               | 39,292(0.9)                   | 30,744(1)       | 1                            | 20.7                                            | 16.9     |
| CSF-4       | 1        | 29.4                          | 16.9                        | 12.5                        | 7                          | 5.5               | 6,252(0.2)                    | 149,523(4.5)    | 23                           | 0.04                                            | 74.9     |
| CSF-5       | 1        | 23.9                          | 12.7                        | 11.2                        | 5.1                        | 6.1               | 12,633(0.4)                   | 300,389(19.7)   | 49                           | 0.7                                             | 91.8     |
| CSF-6       | 1        | 19.4                          | 15.0                        | 4.4                         | -0.4                       | 4.8               | 7,337(0.3)                    | 275,393(6.8)    | 23                           | 0.1                                             | 90.8     |
| CSF-7       | 1        | 19.8                          | 10.9                        | 9.0                         | 3.8                        | 5.2               | 87,433(2.7)                   | 1,186,651(61)   | 23                           | 77.7                                            | 97.9     |
| CSF-8       | 2        | 19.9                          | 18.1                        | 1.8                         | 2.4                        | -0.6              | 26,124(0.9)                   | 1,378,208(27.4) | 30                           | 3.6                                             | 56.0     |
| CSF-9       | 1        | 22.4                          | 13.0                        | 9.4                         | -0.2                       | 9.6               | 16,934(0.5)                   | 1,359,812(65.7) | 131                          | 1.1                                             | 96.0     |
| CSF-10      | 2        | 17.3                          | 11.4                        | 5.9                         | 2.8                        | 3.1               | 68,024(2.4)                   | 496,848(22.6)   | 9                            | 50.0                                            | 85.8     |
| CSF-11      | 1        | 24.6                          | 17.0                        | 7.7                         | 1.9                        | 5.8               | 1,908(0.05)                   | 318,036(15.6)   | 312                          | <0.01                                           | 83.7     |
| CSF-12      | 1        | 21.2                          | 11.0                        | 10.2                        | -5.6                       | 15.8              | 11,344(0.3)                   | 1,694,167(86.5) | 288                          | 0.3                                             | 97.8     |

<sup>a</sup>The numbers represent Nm read pairs and their percentage (in parentheses) of total read pairs obtained from the specimen.

<sup>b</sup>Fold enrichment is equal to % of enriched Nm reads/% of unenriched Nm reads.



Table S4. Full molecular typing results for assembled specimen sequence data

| Spec <sup>a</sup> | Genome assembly size (kb) | No. cgMLST loci identified (% of the total) | cgMLST Accuracy <sup>b</sup> % | Typing Accuracy | PorA VR1 | PorA VR2 | FetA           | PorB  | FHbp | NhbA           | NadA | abcZ | adk | aroE | fumC | gdh | pdhC           | pgm | MLST              |
|-------------------|---------------------------|---------------------------------------------|--------------------------------|-----------------|----------|----------|----------------|-------|------|----------------|------|------|-----|------|------|-----|----------------|-----|-------------------|
| <u>Ur-1</u>       | 1,100                     | 209(13)                                     | NA                             | NA              | -        | 10-8     | F3-6           | -     | -    | -              | -    | -    | -   | N    | -    | -   | -              | -   | -                 |
| <u>Ur-6</u>       | 1,495                     | 410(25.5)                                   | 79.7                           | 6/7             | 5-1      | 10-8     | F3-6           | -     | -    | -              | 2    | 2    | -   | -    | -    | 8   | N <sup>e</sup> | -   | -                 |
| <u>Ur-8</u>       | 1,926                     | 1,262(78.6)                                 | 93.8                           | 12/13           | 5-1      | 10-8     | F3-6           | 2-2   | 896  | 20             | -    | 2    | 3   | 4    | 3    | N*  | 4              | 6   | New ST*; CC11     |
| <u>Ur-1</u>       | 866                       | 584(36.4)                                   | NA                             | NA              | -        | -        | F3-6           | -     | -    | 20             | -    | 2    | -   | -    | -    | 8   | -              | -   | -                 |
| <u>Ur-2</u>       | 2,092                     | 1,561(97.3)                                 | 99.2                           | 14/14           | 5-1      | 10-1     | F3-6           | 2-2   | 896  | 20             | 2    | 2    | 3   | 4    | 3    | 8   | 4              | 6   | ST-11; CC11       |
| <u>Ur-3</u>       | 1,249                     | 842(52.5)                                   | 90.3                           | 5/5             | -        | -        | F3-6           | -     | -    | -              | -    | 2    | -   | 4    | -    | -   | 4              | 6   | -                 |
| <u>Ur-4</u>       | 1,115                     | 776(48.3)                                   | 92.1                           | 5/5             | -        | -        | F3-6           | -     | -    | -              | 2    | -    | 3   | 4    | 3    | -   | -              | -   | -                 |
| <u>Ur-5</u>       | 2,095                     | 1,562(97.3)                                 | 99.6                           | 14/14           | 5-1      | 10-1     | F3-6           | 2-2   | 896  | 20             | 2    | 2    | 3   | 4    | 3    | 8   | 4              | 6   | ST-11; CC11       |
| <u>Ur-6</u>       | 769                       | 365(22.7)                                   | 86.5                           | 4/5             | 5-1      | 10-8     | -              | -     | -    | 20             | -    | -    | -   | 4    | 927* | -   | -              | -   | -                 |
| <u>Ur-7</u>       | 2,043                     | 1,519(94.6)                                 | 98.5                           | 13/13           | -        | 10-8     | F3-6           | 2-2   | 896  | 20             | 2    | 2    | 3   | 4    | 3    | 8   | 4              | 6   | ST-11; CC11       |
| <u>Ur-8</u>       | 994                       | 634(39.5)                                   | 90.8                           | 5/6             | -        | -        | F3-6           | -     | 896  | -              | 2    | -    | -   | -    | -    | N*  | 4              | 6   | -                 |
| <u>Ur-9</u>       | 2,044                     | 1,535(95.6)                                 | 97.7                           | 13/13           | 5-1      | 10-8     | F3-6           | -     | 896  | 20             | 2    | 2    | 3   | 4    | 3    | 8   | 4              | 6   | ST-11; CC11       |
| <u>Ur-10</u>      | 2,015                     | 1,482(92.3)                                 | 95.7                           | 14/14           | 5-1      | 10-8     | F3-6           | 2-2   | 896  | 20             | 2    | 2    | 3   | 4    | 3    | 8   | 4              | 6   | ST-11; CC11       |
| <u>Ur-11</u>      | 1,980                     | 1,474(91.8)                                 | 98.2                           | 14/14           | 5-1      | 10-8     | F3-6           | 2-2   | 896  | 20             | 2    | 2    | 3   | 4    | 3    | 8   | 4              | 6   | ST-11; CC11       |
| <u>CSF-1</u>      | 1,848                     | 874(54.5)                                   | NA                             | NA              | 5        | 2        | F1-1           | 2-2   | 613  | - <sup>c</sup> | 6    | 672  | 3   | -    | -    | 8   | -              | -   | -                 |
| <u>CSF-3</u>      | 1,988                     | 1,235(76.9)                                 | NA                             | NA              | 5        | 2        | N <sup>d</sup> | 2-2   | 613  | -              | 6    | -    | 3   | -    | -    | 8   | -              | 6   | -                 |
| <u>CSF-5</u>      | 1,257                     | 343(21.4)                                   | NA                             | NA              | 21-15    | 16       | -              | -     | -    | -              | -    | -    | -   | -    | -    | -   | -              | -   | -                 |
| <u>CSF-7</u>      | 2,080                     | 1,527(95.1)                                 | NA                             | NA              | 21-15    | 16       | F1-7           | 3-463 | 27   | -              | -    | 12   | 11  | 4    | 643  | 187 | 2              | 120 | ST-12446; CC10217 |
| <u>CSF-8</u>      | 1,476                     | 452(28.2)                                   | NA                             | NA              | 5        | 2        | F1-1           | -     | -    | -              | -    | 2    | 3   | 4    | -    | 8   | 4              | 6   | -                 |
| <u>CSF-10</u>     | 2,024                     | 1,413(88)                                   | NA                             | NA              | 5-1      | 10-1     | F1-31          | 2-231 | 74   | 359            | -    | 10   | 3   | 15   | 7    | 5   | 41             | 31  | ST-181; CC181     |
| <u>CSF-1</u>      | 2,058                     | 1,554(96.8)                                 | NA                             | NA              | 5        | 2        | F1-1           | 2-2   | 613  | 96             | 6    | 2    | 3   | 4    | 3    | 8   | 4              | 6   | ST-11; CC11       |
| <u>CSF-2</u>      | 1,641                     | 828(51.6)                                   | NA                             | NA              | -        | 2        | -              | -     | -    | 96             | 6    | 2    | -   | 4    | -    | 8   | 4              | 6   | -                 |
| <u>CSF-3</u>      | 1,664                     | 894(55.7)                                   | NA                             | NA              | 5        | 2        | F1-1           | 2-61  | -    | 96             | N    | 2    | 3   | 4    | 3    | 8   | 4              | 6   | ST-11; CC11       |
| <u>CSF-4</u>      | 1,882                     | 1,377(85.8)                                 | NA                             | NA              | 5-1      | 10-1     | -              | -     | 74   | 359            | -    | 10   | 3   | 15   | 7    | 5   | 41             | 31  | ST-181; CC181     |
| <u>CSF-5</u>      | 2,010                     | 1,517(94.5)                                 | NA                             | NA              | 21-15    | 16       | F1-7           | 3-463 | 27   | -              | -    | 12   | 11  | 4    | 643  | 187 | 2              | 120 | ST-12446; CC10217 |
| <u>CSF-6</u>      | 2,040                     | 1,518(94.6)                                 | NA                             | NA              | 21-15    | 16       | F1-7           | 3-463 | 27   | 798            | -    | 12   | 5   | 4    | 643  | 187 | 2              | 120 | ST-10217; CC10217 |
| <u>CSF-7</u>      | 2,036                     | 1,553(96.8)                                 | NA                             | NA              | 21-15    | 16       | F1-7           | 3-463 | 27   | 798            | -    | 12   | 11  | 4    | 643  | 187 | 2              | 120 | ST-12446; CC10217 |
| <u>CSF-8</u>      | 1,696                     | 164(10.2)                                   | NA                             | NA              | -        | 2        | -              | N     | -    | -              | -    | 2    | -   | -    | N    | -   | 4              | -   | -                 |
| <u>CSF-9</u>      | 2,064                     | 1,512(94.2)                                 | NA                             | NA              | 5-1      | 10-1     | F1-31          | 2-231 | 74   | 359            | -    | 10   | 3   | 15   | 7    | 5   | 41             | 31  | ST-181; CC181     |
| <u>CSF-10</u>     | 2,032                     | 1,369(85.3)                                 | NA                             | NA              | 5-1      | 10-1     | F1-31          | -     | 74   | N              | -    | 10   | 3   | 15   | 7    | 5   | N              | 31  | New ST; CC181     |
| <u>CSF-11</u>     | 1,901                     | 1,391(86.7)                                 | NA                             | NA              | 5        | 2        | F1-1           | 2-2   | 613  | 96             | 6    | 2    | 3   | 4    | 3    | 8   | 4              | 6   | ST-11; CC11       |
| <u>CSF-12</u>     | 2,092                     | 1,570(97.8)                                 | NA                             | NA              | 5        | 2        | F1-1           | 2-2   | 613  | 96             | 6    | 2    | 3   | 4    | 3    | 8   | 4              | 6   | ST-11; CC11       |

- a. Spec – Specimen ID; Underlined - enriched specimens; non - underlined-non-enriched specimens. No assembly was produced for 15 unenriched and 1 enriched specimen.
- b. Percentage of identified cgMLST loci or individual typing loci that are identical to those from the matching isolate. Available only for urine specimens
- c. Dash indicates that an allele could not be identified in the assembled specimen sequence data
- d. “N” indicates a new allele, not listed in PubMLST allele list
- e. Asterisk indicates that a different allele was identified in the matching isolate

Table S5. Evolutionary tree distance (substitutions per site) between Nm sequences from urine specimens and isolates obtained from the same urethritis case.

| <b>Specimen</b> | <b>Unenriched</b>    | <b>Enriched</b>      |
|-----------------|----------------------|----------------------|
| <b>Ur-1</b>     | $2.7 \times 10^{-3}$ | $1.8 \times 10^{-4}$ |
| <b>Ur-3</b>     | - <sup>a</sup>       | 0                    |
| <b>Ur-4</b>     | -                    | $2.2 \times 10^{-4}$ |
| <b>Ur-5</b>     | $6.8 \times 10^{-4}$ | 0                    |
| <b>Ur-6</b>     | $2.1 \times 10^{-4}$ | $8.4 \times 10^{-4}$ |
| <b>Ur-7</b>     | $2.9 \times 10^{-3}$ | $2.7 \times 10^{-6}$ |
| <b>Ur-8</b>     | 0                    | 0                    |
| <b>Ur-9</b>     | -                    | $9.3 \times 10^{-5}$ |
| <b>Ur-10</b>    | -                    | 0                    |
| <b>Ur-11</b>    | $2.4 \times 10^{-4}$ | $1.1 \times 10^{-5}$ |
| <b>Ur-12</b>    | -                    | $1.2 \times 10^{-3}$ |

a. Dash indicates insufficient data to perform EPA

Table S6. Molecular typing of Nm in specimens from Togo and Burkina-Faso meningitis outbreak, 2019

| Spec <sup>a</sup>        | Seq method <sup>b</sup> | Ct sodC   | Genome assembly size (kb) | No. cgMLST loci identified | PorA VR1     | PorA VR2    | FetA        | PorB         | FHbp       | NhbA             | NadA           | abcZ                   | adk        | aroE       | fumC       | gdh        | pdhC      | pgm        | MLST                    |
|--------------------------|-------------------------|-----------|---------------------------|----------------------------|--------------|-------------|-------------|--------------|------------|------------------|----------------|------------------------|------------|------------|------------|------------|-----------|------------|-------------------------|
| BF_1                     | Unenr                   | 17        | 2,136,395                 | 1,559                      | 21-15        | 16          | F1-7        | 3-463        | 27         | 798              | - <sup>d</sup> | 12                     | 5          | 4          | 643        | 187        | 2         | 120        | ST-10217; CC10217       |
| BF_2                     | Unenr                   | 19        | 2,132,672                 | 1,556                      | 21-15        | 16          | F1-7        | 3-463        | 27         | 798              | -              | 12                     | 5          | 4          | 643        | 187        | 2         | 120        | ST-10217; CC10217       |
| BF_3                     | Unenr                   | 17        | 2,132,682                 | 1,557                      | 21-15        | 16          | F1-7        | 3-463        | 27         | 798              | -              | 12                     | 5          | 4          | 643        | 187        | 2         | 120        | ST-10217; CC10217       |
| BF_4                     | Unenr                   | 16        | 2,064,493                 | 1,560                      | 21-15        | 16          | F1-7        | 3-463        | 27         | 798              | -              | 12                     | 5          | 4          | 643        | 187        | 2         | 120        | ST-10217; CC10217       |
| BF_5                     | Unenr                   | 16        | 2,063,009                 | 1,564                      | 21-15        | 16          | F1-7        | 3-463        | 27         | 798              | -              | 12                     | 5          | 4          | 643        | 187        | 2         | 120        | ST-10217; CC10217       |
| BF_6                     | Unenr                   | 19        | 2,052,439                 | 1,559                      | 21-15        | 16          | F1-7        | 3-463        | 27         | 798              | -              | 12                     | 5          | 4          | 643        | 187        | 2         | 120        | ST-10217; CC10217       |
| BF_7                     | Unenr                   | 18        | 2,064,961                 | 1,556                      | 21-15        | 16          | F1-7        | 3-463        | 27         | 798              | -              | 12                     | 5          | 4          | 643        | 187        | 2         | 120        | ST-10217; CC10217       |
| BF_8                     | Unenr                   | 19        | 2,069,327                 | 1,563                      | 21-15        | 16          | F1-7        | 3-463        | 27         | 798              | -              | 12                     | 5          | 4          | 643        | 187        | 2         | 120        | ST-10217; CC10217       |
| BF_9                     | Unenr                   | 16        | 2,069,218                 | 1,560                      | 21-15        | 16          | F1-7        | 3-463        | 27         | 798              | -              | 12                     | 5          | 4          | 643        | 187        | 2         | 120        | ST-10217; CC10217       |
| BF_10                    | Unenr                   | 17        | 2,093,455                 | 1,553                      | 21-15        | 16          | F1-7        | 3-463        | 27         | 798 <sup>f</sup> | -              | 12                     | 5          | 4          | 643        | 187        | 2         | 120        | ST-10217; CC10217       |
| BF_11                    | SWGA_1                  | 21        | 2,104,298                 | 1,530                      | 21-15        | 16          | F1-7        | 3-463        | 27         | 798              | -              | 12                     | 5          | 4          | 643        | 187        | 2         | 120        | ST-10217; CC10217       |
| BF_12                    | SWGA_1                  | 30        | 2,059,934                 | 1,509                      | 21-15        | 16          | F1-7        | 3-463        | 27         | 798              | -              | 12                     | 5          | 4          | 643        | 187        | 2         | 120        | ST-10217; CC10217       |
| <b>BF_13<sup>c</sup></b> | <b>SWGA_1</b>           | <b>25</b> | <b>1,351,960</b>          | <b>534</b>                 | <b>21-15</b> | <b>16</b>   | <b>F1-7</b> | <b>-</b>     | <b>27</b>  | <b>-</b>         | <b>-</b>       | <b>New<sup>e</sup></b> | <b>-</b>   | <b>4</b>   | <b>-</b>   | <b>187</b> | <b>2</b>  | <b>120</b> | <b>-</b>                |
| BF_14                    | SWGA_1                  | 30        | 2,133,478                 | 1,535                      | 21-15        | 16          | F1-7        | 3-463        | 27         | 798              | -              | 12                     | 5          | 4          | 643        | 187        | 2         | 120        | ST-10217; CC10217       |
| BF_15                    | SWGA_1                  | 22        | 2,064,379                 | 1,520                      | 21-15        | 16          | F1-7        | 3-463        | 27         | 798              | -              | -                      | 5          | 4          | 643        | 187        | 2         | 120        | -                       |
| BF_16                    | SWGA_1                  | 33        | 2,095,986                 | 1,551                      | 21-15        | 16          | F1-7        | 3-463        | 27         | 798              | -              | 12                     | 5          | 4          | 643        | 187        | 2         | 120        | ST-10217; CC10217       |
| BF_17                    | SWGA_1                  | 26        | 2,085,832                 | 1,549                      | 21-15        | 16          | F1-7        | 3-463        | 27         | 798              | -              | 12                     | 5          | 4          | 643        | 187        | 2         | 120        | ST-10217; CC10217       |
| Togo_1                   | Unenr                   | 17        | 2,121,115                 | 1,552                      | 21-15        | -           | F1-7        | 3-463        | 111        | 798              | -              | 12                     | 5          | 4          | 7          | 187        | 2         | 120        | ST-9367; CC10217        |
| <b>Togo_2</b>            | <b>SWGA_1</b>           | <b>20</b> | <b>2,508,337</b>          | <b>1,222</b>               | <b>21-15</b> | <b>-</b>    | <b>F1-7</b> | <b>3-463</b> | <b>111</b> | <b>798</b>       | <b>-</b>       | <b>12</b>              | <b>5</b>   | <b>4</b>   | <b>7</b>   | <b>187</b> | <b>-</b>  | <b>120</b> | <b>-</b>                |
| <b>Togo_3</b>            | <b>SWGA_1</b>           | <b>33</b> | <b>1,081,654</b>          | <b>442</b>                 | <b>-</b>     | <b>-</b>    | <b>-</b>    | <b>-</b>     | <b>-</b>   | <b>-</b>         | <b>-</b>       | <b>-</b>               | <b>-</b>   | <b>-</b>   | <b>7</b>   | <b>-</b>   | <b>-</b>  | <b>120</b> | <b>-</b>                |
| Togo_4                   | SWGA_1                  | 25        | 2,084,690                 | 1,517                      | 21-15        | -           | F1-7        | 3-463        | 111        | 798              | -              | 12                     | 5          | 4          | 7          | 187        | 2         | 120        | ST-9367; CC10217        |
| <b>Togo_5</b>            | <b>SWGA_1</b>           | <b>32</b> | <b>1,077,209</b>          | <b>410</b>                 | <b>-</b>     | <b>-</b>    | <b>-</b>    | <b>-</b>     | <b>-</b>   | <b>-</b>         | <b>-</b>       | <b>-</b>               | <b>-</b>   | <b>-</b>   | <b>-</b>   | <b>187</b> | <b>-</b>  | <b>120</b> | <b>-</b>                |
| <b>Togo_6</b>            | <b>SWGA_1</b>           | <b>30</b> | <b>1,923,570</b>          | <b>1,375</b>               | <b>21-15</b> | <b>-</b>    | <b>F1-7</b> | <b>-</b>     | <b>111</b> | <b>-</b>         | <b>-</b>       | <b>12</b>              | <b>5</b>   | <b>4</b>   | <b>7</b>   | <b>187</b> | <b>2</b>  | <b>120</b> | <b>ST-9367; CC10217</b> |
| Togo_7                   | SWGA_1                  | 22        | 2,114,107                 | 1,539                      | 21-15        | -           | F1-7        | 3-463        | 111        | 798              | -              | 12                     | 5          | 4          | 7          | 187        | 2         | 120        | ST-9367; CC10217        |
| <b>Togo_8</b>            | <b>SWGA_1</b>           | <b>26</b> | <b>2,153,980</b>          | <b>1,236</b>               | <b>21-15</b> | <b>-</b>    | <b>F1-7</b> | <b>3-463</b> | <b>111</b> | <b>798</b>       | <b>-</b>       | <b>12</b>              | <b>5</b>   | <b>4</b>   | <b>7</b>   | <b>187</b> | <b>2</b>  | <b>120</b> | <b>ST-9367; CC10217</b> |
| Togo_9                   | SWGA_1                  | 25        | 2,114,641                 | 1,533                      | 21-15        | -           | F1-7        | 3-463        | 111        | 798              | -              | 12                     | 5          | 4          | 7          | 187        | 2         | 120        | ST-9367; CC10217        |
| <b>Togo_10</b>           | <b>SWGA_2</b>           | <b>26</b> | <b>2,210,580</b>          | <b>1,263</b>               | <b>21-15</b> | <b>-</b>    | <b>F1-7</b> | <b>-</b>     | <b>-</b>   | <b>-</b>         | <b>-</b>       | <b>12</b>              | <b>5</b>   | <b>4</b>   | <b>New</b> | <b>187</b> | <b>2</b>  | <b>120</b> | <b>New</b>              |
| <b>Togo_11</b>           | <b>SWGA_1</b>           | <b>22</b> | <b>1,679,000</b>          | <b>952</b>                 | <b>21-15</b> | <b>-</b>    | <b>F1-7</b> | <b>-</b>     | <b>111</b> | <b>798</b>       | <b>-</b>       | <b>-</b>               | <b>-</b>   | <b>4</b>   | <b>7</b>   | <b>-</b>   | <b>2</b>  | <b>120</b> | <b>-</b>                |
| Togo_12                  | SWGA_1                  | 23        | 2,116,610                 | 1,540                      | 21-15        | -           | F1-7        | 3-463        | 111        | 798              | -              | 12                     | 5          | 4          | 7          | 187        | 2         | 120        | ST-9367; CC10217        |
| Togo_13                  | SWGA_1                  | 28        | 2,003,579                 | 1,413                      | 21-15        | -           | F1-7        | 3-463        | 111        | -                | -              | 12                     | -          | 4          | 7          | 187        | 2         | 120        | -                       |
| Togo_14                  | SWGA_1                  | 27        | 2,014,369                 | 1,424                      | -            | -           | F1-7        | 3-463        | 111        | 798              | -              | 12                     | -          | 4          | 7          | 187        | 2         | -          | -                       |
| Togo_15                  | SWGA_1                  | 21        | 2,107,985                 | 1,544                      | 21-15        | -           | F1-7        | 3-463        | 111        | 798              | -              | 12                     | 5          | 4          | 7          | 187        | 2         | 120        | ST-9367; CC10217        |
| <b>Togo_16</b>           | <b>SWGA_2</b>           | <b>26</b> | <b>842,874</b>            | <b>159</b>                 | <b>-</b>     | <b>-</b>    | <b>F1-7</b> | <b>-</b>     | <b>-</b>   | <b>-</b>         | <b>-</b>       | <b>-</b>               | <b>-</b>   | <b>-</b>   | <b>-</b>   | <b>-</b>   | <b>-</b>  | <b>-</b>   | <b>-</b>                |
| <b>Togo_17</b>           | <b>SWGA_1</b>           | <b>23</b> | <b>2,365,275</b>          | <b>1,377</b>               | <b>5-1</b>   | <b>10-1</b> | <b>F1-7</b> | <b>2-231</b> | <b>111</b> | <b>New</b>       | <b>-</b>       | <b>10</b>              | <b>3</b>   | <b>New</b> | <b>7</b>   | <b>117</b> | <b>41</b> | <b>8</b>   | <b>New</b>              |
| <b>Togo_18</b>           | <b>SWGA_1</b>           | <b>22</b> | <b>1,828,557</b>          | <b>1,224</b>               | <b>21-15</b> | <b>-</b>    | <b>F1-7</b> | <b>-</b>     | <b>111</b> | <b>-</b>         | <b>-</b>       | <b>12</b>              | <b>New</b> | <b>4</b>   | <b>7</b>   | <b>187</b> | <b>2</b>  | <b>120</b> | <b>New</b>              |
| Togo_19                  | SWGA_1                  | 20        | 2,061,090                 | 1,557                      | 21-15        | -           | F1-7        | 3-463        | 111        | 798              | -              | 12                     | 5          | 4          | 7          | 187        | 2         | 120        | ST-9367; CC10217        |

<sup>a</sup>Spec – Specimen name: BF – Burkina-Faso specimens; Togo – Togo specimens

<sup>b</sup>Seq method – Sequencing method: SWGA\_1 – protocol 1; SWGA\_2 – protocol 2

<sup>c</sup>Red symbols – Specimens which did not pass accuracy cutoff of 1,400 cgMLST identified

<sup>d</sup>Not enough information to identify locus or MLST

<sup>e</sup>New locus or MLST

<sup>f</sup>Nhba marker for this specimen was determined from the corresponding SWGA enriched back up of the specimen

Table S7. Serogroup data of Nm in specimens from Togo and Burkina-Faso meningitis outbreak, 2019

| Spec <sup>a</sup>  | Seq method <sup>b</sup> | Ct sodC | Capsular genes identified                            | Capsule Locus Integrity Status                                                              | Backbone type | Final Interpretation |
|--------------------|-------------------------|---------|------------------------------------------------------|---------------------------------------------------------------------------------------------|---------------|----------------------|
| BF_1               | Unenr                   | 17      | csc,cssA,cssB,cssC,ctrA,ctrB,ctrC,ctrD,ctrE,ctrF,tex | All essential capsule genes intact and present                                              | C             | C                    |
| BF_2               | Unenr                   | 19      | csc,cssA,cssB,cssC,ctrA,ctrB,ctrC,ctrD,ctrE,ctrF,tex | All essential capsule genes intact and present                                              | C             | C                    |
| BF_3               | Unenr                   | 17      | csc,cssA,cssB,cssC,ctrA,ctrB,ctrC,ctrD,ctrE,ctrF,tex | All essential capsule genes intact and present                                              | C             | C                    |
| BF_4               | Unenr                   | 16      | csc,cssA,cssB,cssC,ctrA,ctrB,ctrC,ctrD,ctrE,ctrF,tex | All essential capsule genes intact and present                                              | C             | C                    |
| BF_5               | Unenr                   | 16      | csc,cssA,cssB,cssC,ctrA,ctrB,ctrC,ctrD,ctrE,ctrF,tex | All essential capsule genes intact and present                                              | C             | C                    |
| BF_6               | Unenr                   | 19      | csc,cssA,cssB,cssC,ctrA,ctrB,ctrC,ctrD,ctrE,ctrF,tex | All essential capsule genes intact and present                                              | C             | C                    |
| BF_7               | Unenr                   | 18      | csc,cssA,cssB,cssC,ctrA,ctrB,ctrC,ctrD,ctrE,ctrF,tex | All essential capsule genes intact and present                                              | C             | C                    |
| BF_8               | Unenr                   | 19      | csc,cssA,cssB,cssC,ctrA,ctrB,ctrC,ctrD,ctrE,ctrF,tex | All essential capsule genes intact and present                                              | C             | C                    |
| BF_9               | Unenr                   | 16      | csc,cssA,cssB,cssC,ctrA,ctrB,ctrC,ctrD,ctrE,ctrF,tex | All essential capsule genes intact and present                                              | C             | C                    |
| BF_10              | Unenr                   | 17      | csc,cssA,cssB,cssC,ctrA,ctrB,ctrC,ctrD,ctrE,ctrF,tex | All essential capsule genes intact and present                                              | C             | C                    |
| BF_11              | SWGA_1                  | 21      | csc,cssA,cssB,cssC,ctrA,ctrB,ctrC,ctrD,ctrE,ctrF,tex | csc and cssA fragmented; cssB disrupted by Insertion                                        | C             | Inconclusive         |
| BF_12              | SWGA_1                  | 30      | ctrA,ctrB,ctrC,ctrD,ctrE,ctrF,tex                    | ctrA fragmented                                                                             | Unclear       | NG                   |
| BF_13 <sup>c</sup> | SWGA_1                  | 25      | csc,ctrA,ctrB,ctrC,ctrD,ctrE,ctrF,tex                | csc, ctrA, ctrB, ctrC, ctrD, ctrE, ctrF and tex - fragmented; cssA, cssB and cssC - missing | C             | NG                   |
| BF_14              | SWGA_1                  | 30      | cssB,ctrA,ctrB,ctrC,ctrD,ctrE,ctrF,tex               | ctrA fragmented                                                                             | Unclear       | NG                   |
| BF_15              | SWGA_1                  | 22      | cssB,cssC,ctrA,ctrB,ctrC,ctrD,ctrE,ctrF,tex          | Capsule genes present shared across multiple Serogroups                                     | Unclear       | NG                   |
| BF_16              | SWGA_1                  | 33      | csc,cssA,cssB,cssC,ctrA,ctrB,ctrC,ctrD,ctrE,ctrF,tex | csc fragmented                                                                              | C             | Inconclusive         |
| BF_17              | SWGA_1                  | 26      | csc,cssA,cssB,cssC,ctrA,ctrB,ctrC,ctrD,ctrE,ctrF,tex | csc, ctrA and ctrB - fragmented                                                             | C             | Inconclusive         |
| Togo_1             | Unenr                   | 17      | csc,cssA,cssB,cssC,ctrA,ctrB,ctrC,ctrD,ctrE,ctrF,tex | All essential capsule genes intact and present                                              | C             | C                    |
| Togo_2             | SWGA_1                  | 19      | cssA,cssB,cssC,ctrA,ctrB,ctrC,ctrD,ctrE,ctrF,tex     | cssA, cssB, cssC, ctrE and tex - fragmented                                                 | Unclear       | NG                   |
| Togo_3             | SWGA_1                  | 33      | ctrC,ctrD,ctrF,tex                                   | ctrC and ctrD - fragmented                                                                  | Unclear       | NG                   |
| Togo_4             | SWGA_1                  | 25      | cssB,cssC,ctrA,ctrB,ctrC,ctrD,ctrE,ctrF,tex          | cssB, cssC and ctrA - fragmented                                                            | Unclear       | NG                   |
| Togo_5             | SWGA_1                  | 32      | cssC,ctrA,ctrB,ctrC,ctrD,ctrF,tex                    | cssC, ctrA, ctrB, ctrC, ctrD, ctrF and tex - fragmented                                     | Unclear       | NG                   |
| Togo_6             | SWGA_1                  | 30      | cssB,cssC,ctrA,ctrB,ctrC,ctrD,ctrE,ctrF,tex          | cssB and cssC - fragmented; ctrA disrupted by insertion                                     | Unclear       | NG                   |
| Togo_7             | SWGA_1                  | 22      | csc,cssA,cssB,cssC,ctrA,ctrB,ctrC,ctrD,ctrE,ctrF,tex | csc - fragmented                                                                            | C             | Inconclusive         |
| Togo_8             | SWGA_1                  | 26      | csc,cssA,cssB,cssC,ctrA,ctrB,ctrC,ctrD,ctrE,ctrF,tex | csc, cssA, cssA, cssB, cssC and tex - fragmented                                            | C             | Inconclusive         |
| Togo_9             | SWGA_1                  | 25      | csc,cssA,cssB,cssC,ctrA,ctrB,ctrC,ctrD,ctrE,ctrF,tex | csc - fragmented                                                                            | C             | Inconclusive         |
| Togo_10            | SWGA_2                  | 26      | csc,cssB,cssC,ctrA,ctrB,ctrC,ctrD,ctrE,ctrF,tex      | csc, cssB, cssC, cssC, ctrB, ctrC, ctrE and tex - fragmented; cssA - missing                | C             | NG                   |
| Togo_11            | SWGA_1                  | 22      | cssB,ctrA,ctrB,ctrC,ctrD,ctrE,ctrF,tex               | cssB, ctrA, ctrB,ctrC and tex - fragmented                                                  | Unclear       | NG                   |
| Togo_12            | SWGA_1                  | 23      | csc,cssA,cssB,cssC,ctrA,ctrB,ctrC,ctrD,ctrE,ctrF,tex | All essential capsule genes intact and present                                              | C             | C                    |
| Togo_13            | SWGA_1                  | 28      | csc,cssA,cssB,cssC,ctrA,ctrB,ctrC,ctrD,ctrE,ctrF,tex | csc - fragmented                                                                            | C             | Inconclusive         |
| Togo_14            | SWGA_1                  | 27      | cssA,cssB,cssC,ctrA,ctrB,ctrC,ctrD,ctrE,ctrF,tex     | cssA, ctrA - fragmented                                                                     | Unclear       | NG                   |
| Togo_15            | SWGA_1                  | 21      | csc,cssA,cssB,cssC,ctrA,ctrB,ctrC,ctrD,ctrE,ctrF,tex | All essential capsule genes intact and present                                              | C             | C                    |
| Togo_16            | SWGA_2                  | 26      | ctrE,tex                                             | ctrE and tex - fragmented                                                                   | Unclear       | NG                   |
| Togo_17            | SWGA_1                  | 23      | cssA,cssC,ctrA,ctrB,ctrC,ctrD,ctrE,ctrF,tex          | cssA and cssC - fragmented                                                                  | Unclear       | NG                   |
| Togo_18            | SWGA_1                  | 22      | csc,cssA,cssB,cssC,ctrA,ctrB,ctrC,ctrD,ctrE,ctrF,tex | csc, cssA, cssB, cssC, ctrA, ctrB and ctrD - fragmented                                     | C             | Inconclusive         |
| Togo_19            | SWGA_1                  | 20      | csc,cssA,cssB,cssC,ctrA,ctrB,ctrC,ctrD,ctrE,ctrF,tex | All essential capsule genes intact and present                                              | C             | C                    |

<sup>a</sup>Spec - Specimen name: BF – Burkina-Faso specimens; Togo – Togo specimens

<sup>b</sup>Seq method - Sequencing method: SWGA\_1 – protocol 1; SWGA\_2 – protocol 2

<sup>c</sup>Red symbols - Specimens which did not pass accuracy cutoff of 1,400 cgMLST identified

Green highlighting - specimens having all essential capsule genes intact and present

Yellow highlighting – specimens having all essential capsule genes present but not intact
